# Supplementary material for: Base-Free Synthesis of Furfurylamines from Biomass Furans Using Ru Pincer Complexes
Source: MDPI journal article supplement (doi:10.3390/catal11050558), 2021-04-28
Supplement: s1 [file s1]

# Base-Free synthesis of furfurylamines from biomass furans using Ru pincer complexes

Danielle Lobo Justo Pinheiro and Martin Nielsen\*

## Supporting Information

### 1. Monitoring the reaction of furfural with aniline using different drying agents

*Table S1.* Monitoring the reaction of furfural and aniline using MgSO<sub>4</sub> as drying agent.

| Entry | Time | 1a (%) | 3 (%) | 2a (%) |
|-------|------|--------|-------|--------|
| 0     | 0    | 100    | -     | -      |
| 1     | 5    | 94     | 6     | -      |
| 2     | 10   | 89     | 7     | 4      |
| 3     | 20   | 84     | 10    | 6      |
| 4     | 30   | 45     | 12    | 43     |
| 5     | 40   | 27     | 13    | 60     |
| 6     | 50   | <3     | 6     | 92     |
| 7     | 60   | -      | -     | 100    |

Reactions were carried out using 1.3 mmol of furfural, 1.2 equivalent aniline and 1.3 mmol of MgSO<sub>4</sub> in 7 mL *i*PrOH.

**Table S2.** Monitoring the reaction of furfural and aniline using Na<sub>2</sub>SO<sub>4</sub> as drying agent.

| Entry | Time | 1a (%) | 3 (%) | 2a (%) |
|-------|------|--------|-------|--------|
| 0     | 0    | 100    | -     | -      |
| 1     | 15   | 5      | 35    | 60     |
| 2     | 30   | 3      | 22    | 70     |
| 3     | 45   | 0      | 10    | 90     |
| 4     | 60   | 0      | 3     | 97     |

Reactions were carried out using 1.3 mmol of furfural, 1.2 equivalent aniline and 1.3 mmol of Na<sub>2</sub>SO<sub>4</sub> in 7 mL *i*PrOH.

## 1. Product characterizations

### (E)-1-(furan-2-yl)-N-phenylmethanimine 1a

$^1\text{H}$  NMR (400 MHz,  $\text{CDCl}_3$ )  $\delta$ : 8.29 (s, 1 H), 7.62 (s, 1 H), 7.39 (t, 2 H,  $J = 8.74$  Hz), 7.26-7.24 (m, 2 H), 6.98 (d, 1 H,  $J = 3.60$  Hz), 6.56 (dd, 1 H,  $J = 3.6$  Hz,  $J = 1.6$  Hz) ppm.  $^{13}\text{C}\{^1\text{H}\}$  NMR (100 MHz)  $\delta$ : 152.1, 151.3, 147.9, 145.9, 129.4, , 126.4, 121.1, 116.6, 112.3 ppm. [64]

#### 1.1. $^1\text{H}$ and $^{13}\text{C}$ NMR spectra of the aldimine 1a.

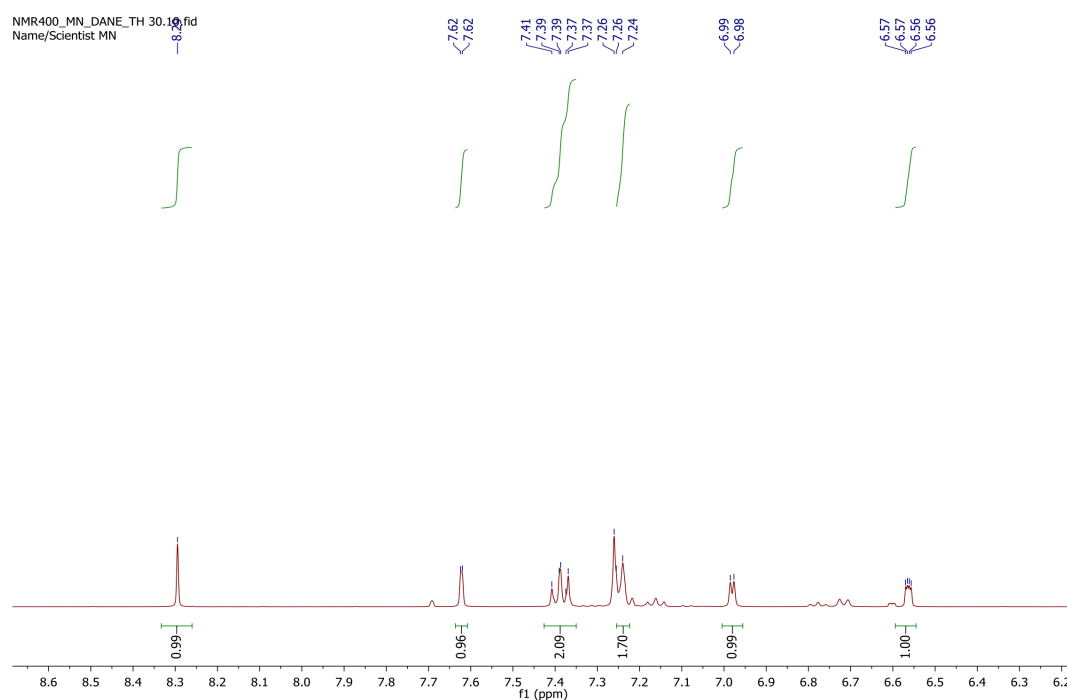

The spectrum contains approximately 5% of the starting material as impurities (furfural and aniline)

**Figure S1.**  $^1\text{H}$  NMR spectrum of 1a (400 MHz,  $\text{CDCl}_3$ )

NMR400\_MN\_DANE\_TH 30.11.fid  
Name/Scientist MN

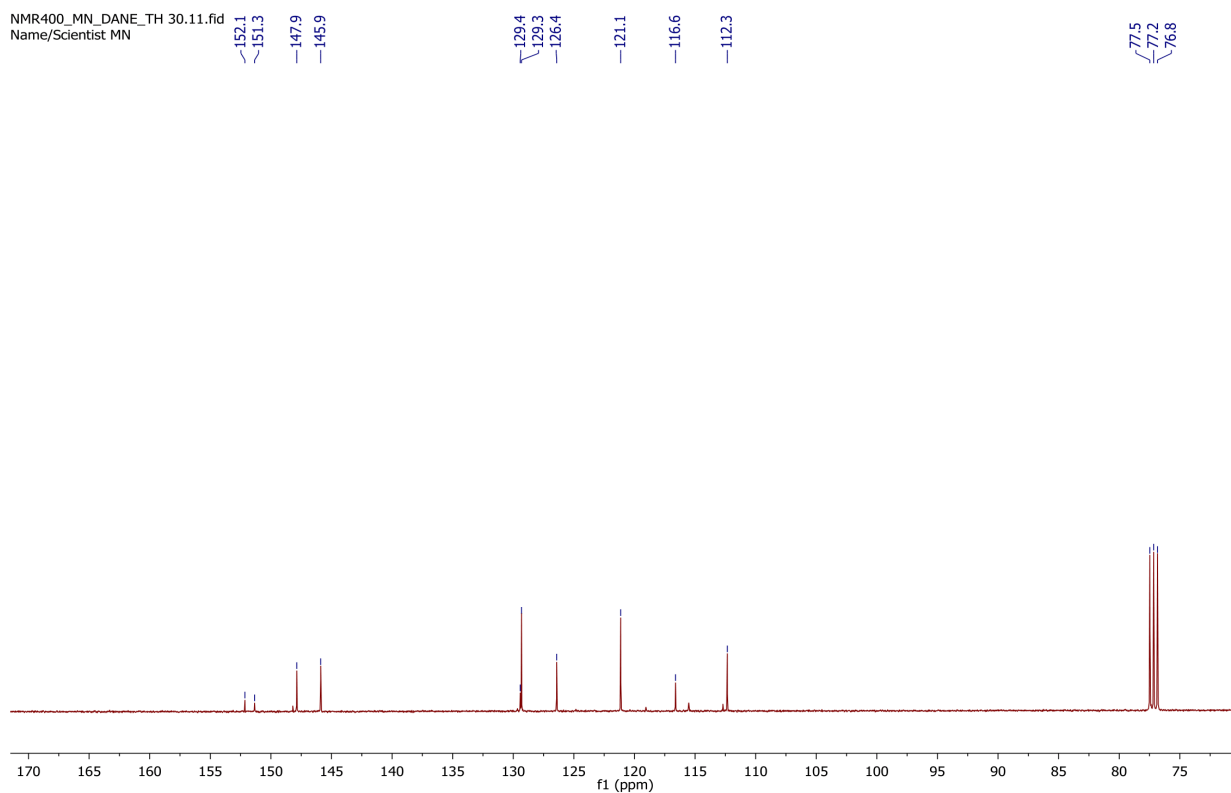

Figure S2.  $^{13}\text{C}$  NMR spectrum of 1a (100 MHz,  $\text{CDCl}_3$ )

1.2.  $^1\text{H}$  and  $^{13}\text{C}$  NMR spectra of the furfurylamines.

**N-(furan-2-ylmethyl)aniline 2a**

The product **2a** was obtained as a yellow oil. 209 mg, 93 %.  $^1\text{H}$  NMR (400 MHz,  $\text{CDCl}_3$ )  $\delta$ : 7.26 (s, 1 H), 7.09 (t, 2 H,  $J = 8$  Hz), 6.65 (t, 1 H,  $J = 8$  Hz), 6.57 (d, 2 H,  $J = 8$  Hz), 6.21 (dd, 1 H,  $J = 4$  Hz,  $J = 1.6$  Hz), 6.12 (dd, 1 H,  $J = 3.2$  Hz,  $J = 1.2$  Hz), 4.2 (s, 2 H), 3.97 (brs, 1 H) ppm.  $^{13}\text{C}\{^1\text{H}\}$  NMR (100 MHz)  $\delta$ : 152.8, 147.6, 142.0, 129.3, 118.2, 113.3, 110.4, 107.1, 41.6 ppm.[1]

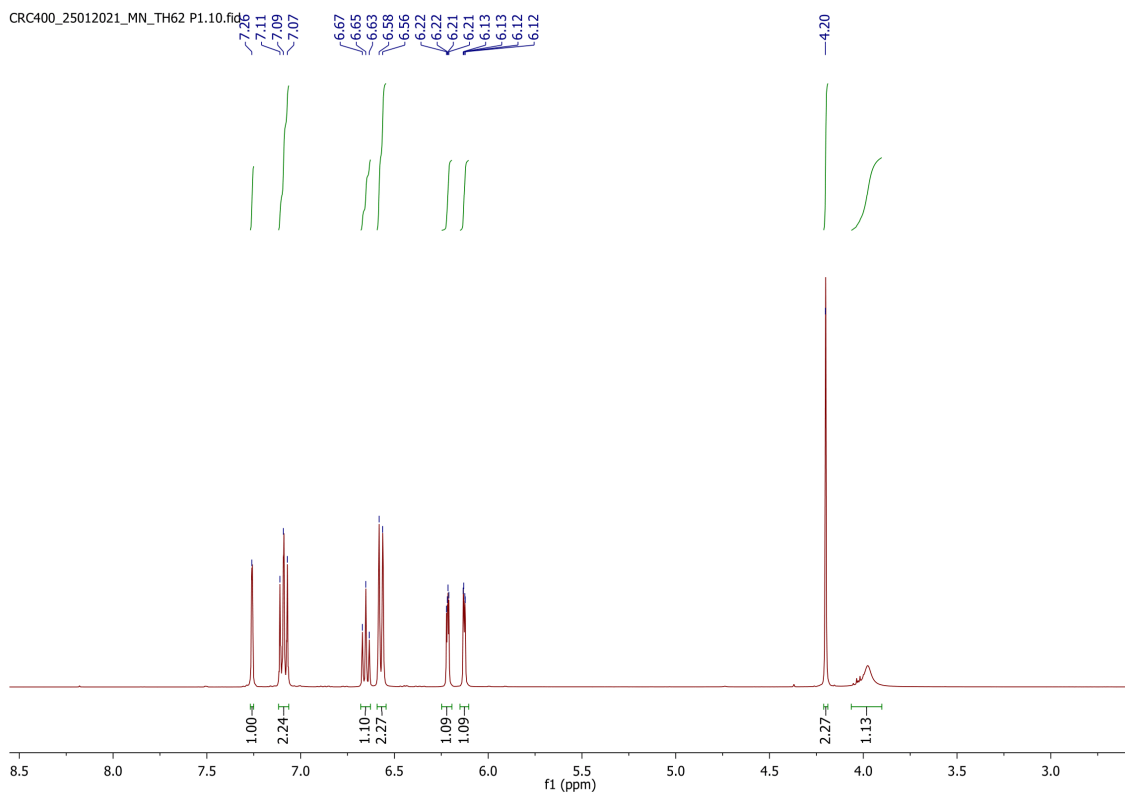

Figure S3.  $^1\text{H}$  NMR spectrum of 2a (400 MHz,  $\text{CDCl}_3$ )

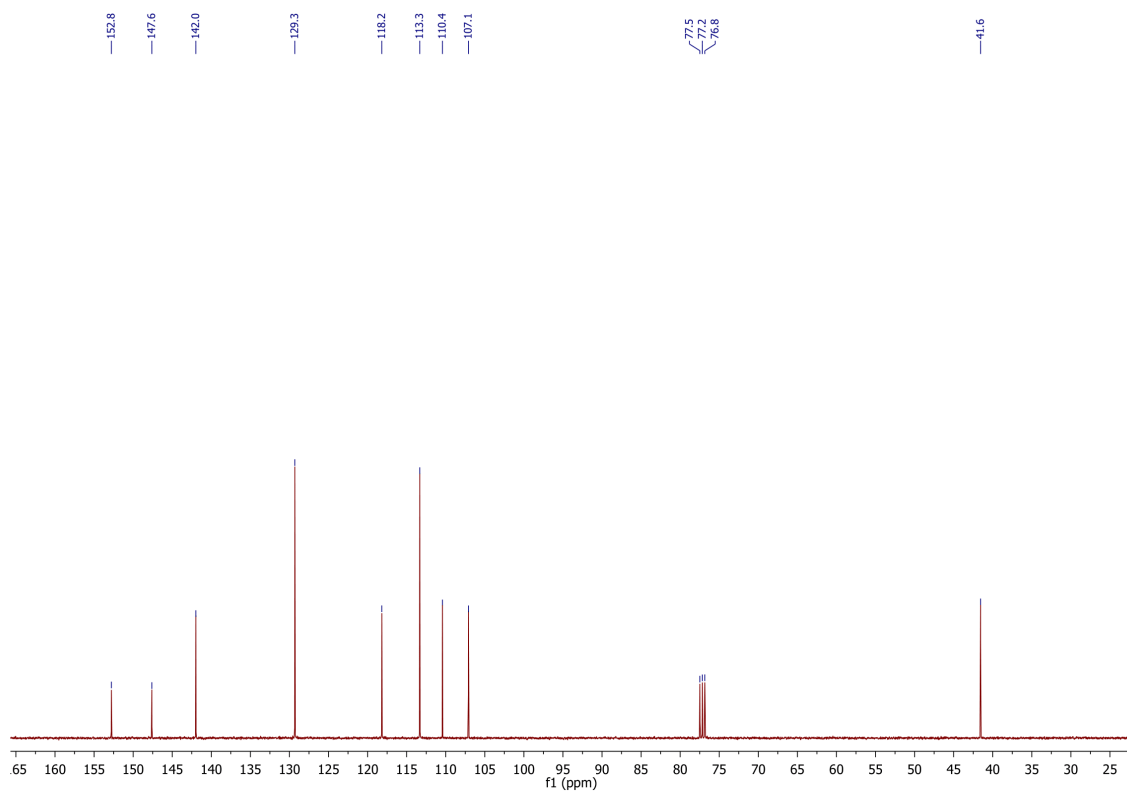

Figure S4. <sup>13</sup>C NMR spectrum of 2a (100 MHz, CDCl<sub>3</sub>)

**4-chloro-*N*-(furan-2-ylmethyl)aniline 2b**

The product **2b** was obtained as a yellow oil. 201 mg, 75 %.  $^1\text{H}$  NMR (400 MHz,  $\text{CDCl}_3$ )  $\delta$ : 7.26 (s, 1 H), 7.02 (d, 2 H,  $J = 8$  Hz), 6.49 (d, 2 H,  $J = 8$  Hz), 6.22 (dd, 1 H,  $J = 3.2$  Hz,  $J = 2$  Hz), 6.12 (dd, 1 H,  $J = 3.2$  Hz,  $J = 0.8$  Hz), 4.48 (brs, 1 H), 4.17 (s, 2 H) ppm.  $^{13}\text{C}\{^1\text{H}\}$  NMR (100 MHz)  $\delta$ : 152.1, 145.9, 142.2, 129.1, 123.0, 114.6, 110.5, 107.4, 41.7 ppm.[65]

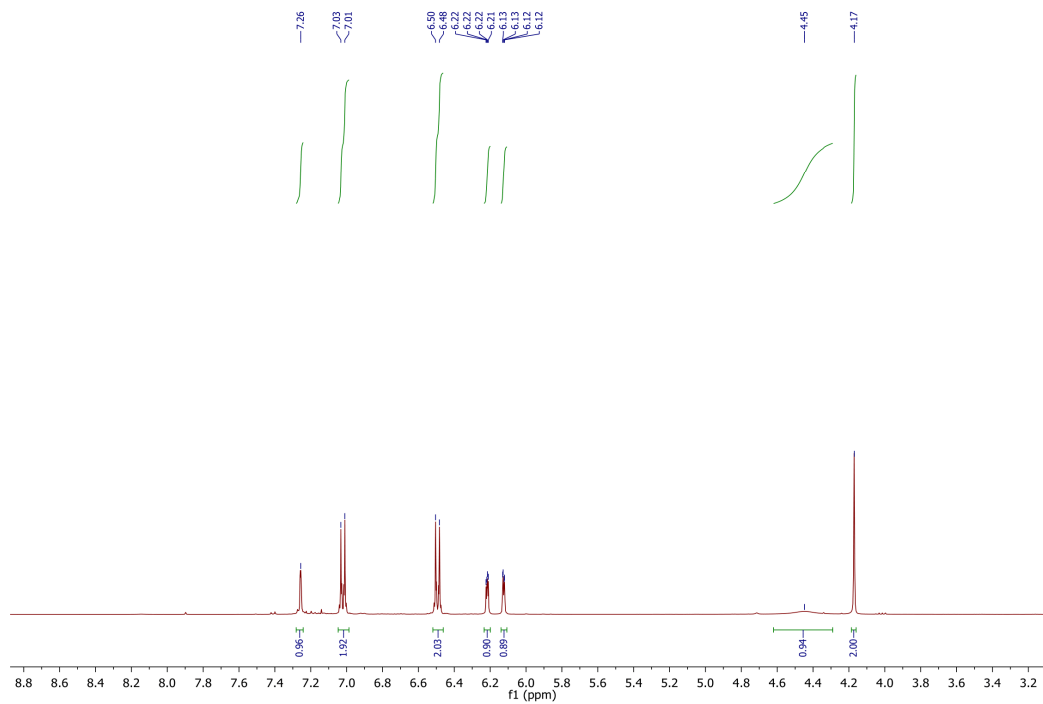

**Figure S5.**  $^1\text{H}$  NMR spectrum of **2b** (400 MHz,  $\text{CDCl}_3$ )

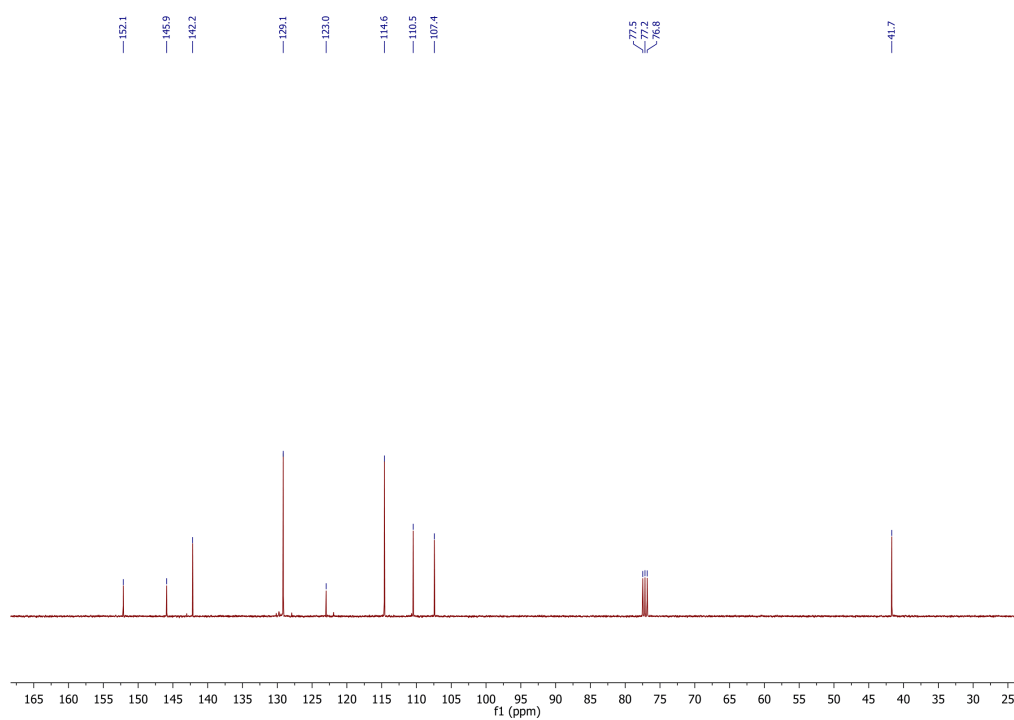

Figure S6. <sup>13</sup>C NMR spectrum of 2b (100 MHz, CDCl<sub>3</sub>)



### 3-chloro-*N*-(furan-2-ylmethyl)aniline **2c**

The product **2c** was obtained as a yellow oil. 163.4 mg, 60 %.  $^1\text{H}$  NMR (400 MHz,  $\text{CDCl}_3$ )  $\delta$ : 7.38 (s, 1 H), 7.09 (t, 1 H,  $J = 8$  Hz), 7.72 (d, 1 H,  $J = 8$  Hz), 6.67 (t, 1 H,  $J = 2.4$  Hz), 6.55 (dd, 1 H,  $J = 8$  Hz,  $J = 2.4$  Hz), 6.34 (t, 1 H,  $J = 2.4$  Hz), 6.25 (d, 1 H,  $J = 3.2$  Hz), 4.39 (brs, 1 H), 4.30 (s, 2 H) ppm.  $^{13}\text{C}\{^1\text{H}\}$  NMR (100 MHz)  $\delta$ : 152.0, 148.6, 142.2, 135.1, 130.3, 118.1, 113.1, 111.7, 110.5, 107.5, 41.4 ppm.[65]

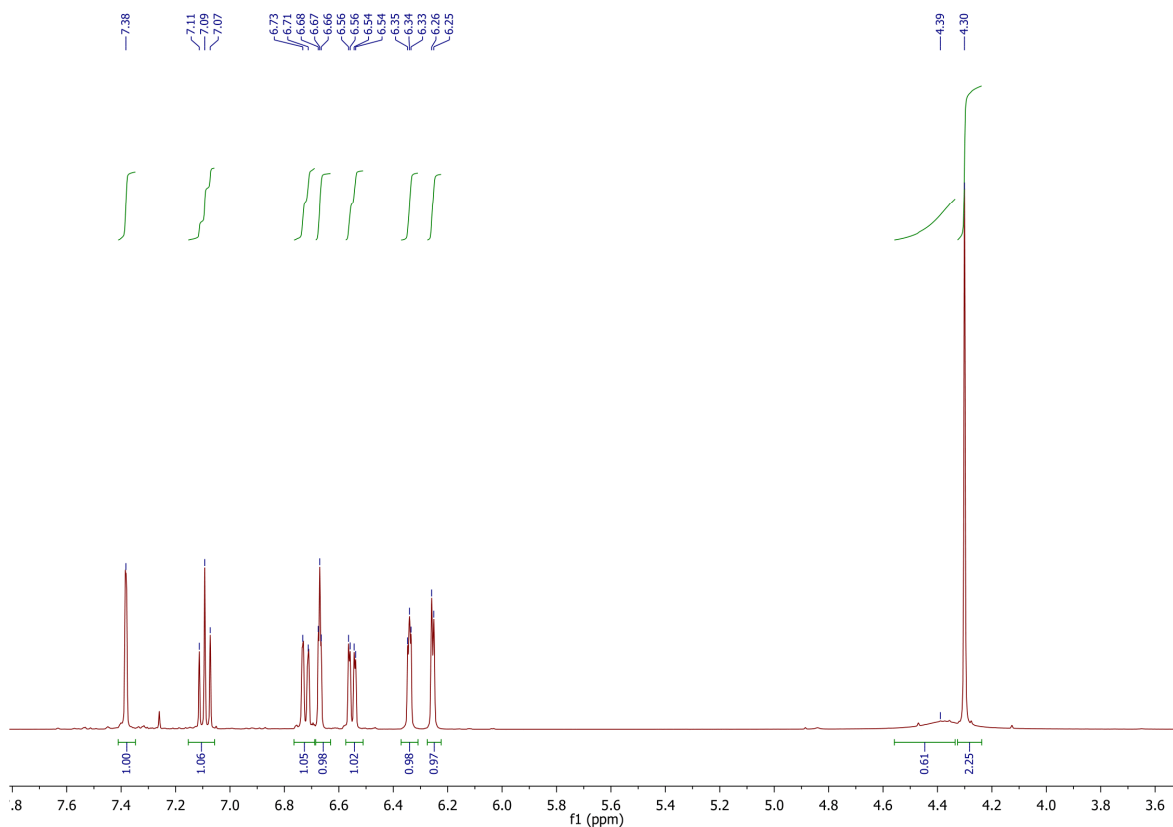

Figure S7.  $^1\text{H}$  NMR spectrum of **2c** (400 MHz,  $\text{CDCl}_3$ )

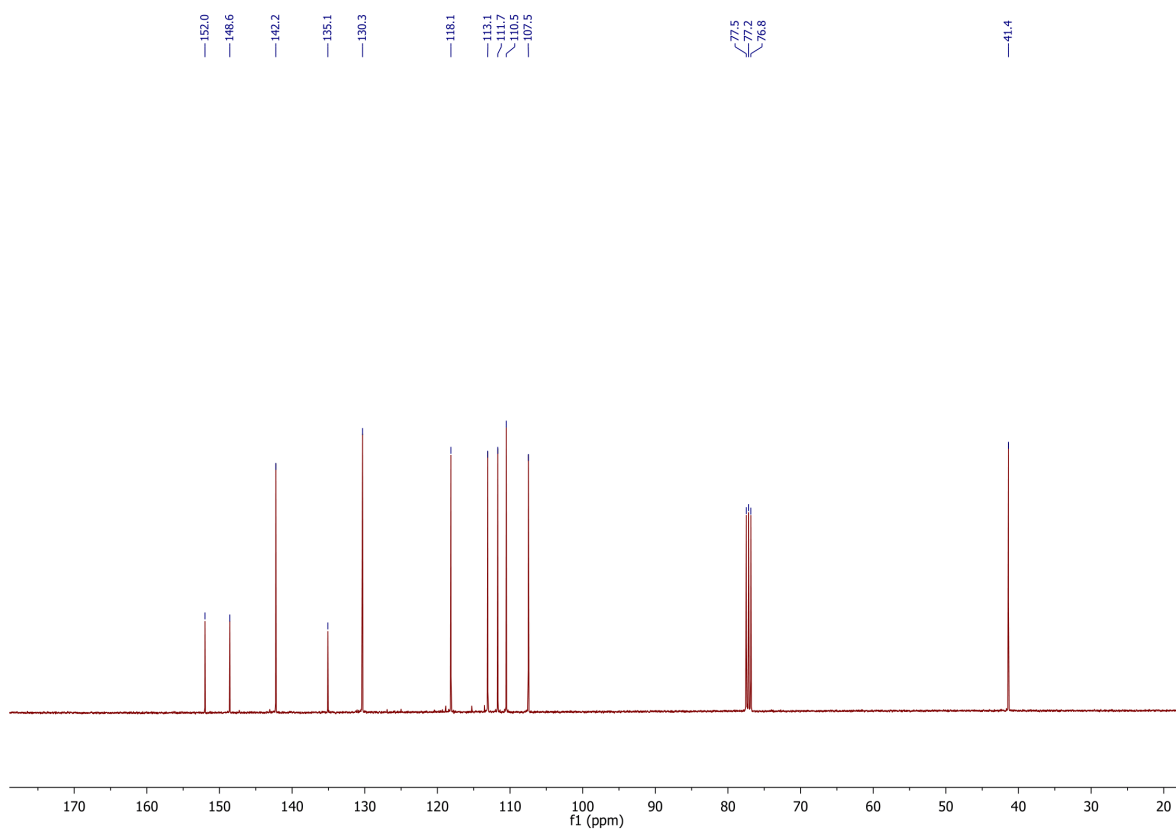

Figure S8. <sup>13</sup>C NMR spectrum of 2c (100 MHz, CDCl<sub>3</sub>)

***N*-(furan-2-ylmethyl)-4-methylaniline **2d****

The product **2d** was obtained as a yellow oil. 127 mg, 61 %.  $^1\text{H}$  NMR (400 MHz,  $\text{CDCl}_3$ )  $\delta$ : 7.26 (s, 1 H), 6.91 (d, 2 H,  $J = 8$  Hz), 6.51 (d, 2 H,  $J = 8$  Hz), 6.22 (dd, 1 H,  $J = 3.2$  Hz,  $J = 2$  Hz), 6.13 (dd, 1 H,  $J = 3.6$  Hz,  $J = 1.2$  Hz), 4.19 (s, 2 H), 3.87 (brs, 1 H), 2.15 (s, 3 H) ppm.  $^{13}\text{C}\{^1\text{H}\}$  NMR (100 MHz)  $\delta$ : 153.1, 145.4, 141.9, 129.8, 127.4, 113.5, 110.4, 107.0, 41.9, 20.5 ppm.[66]

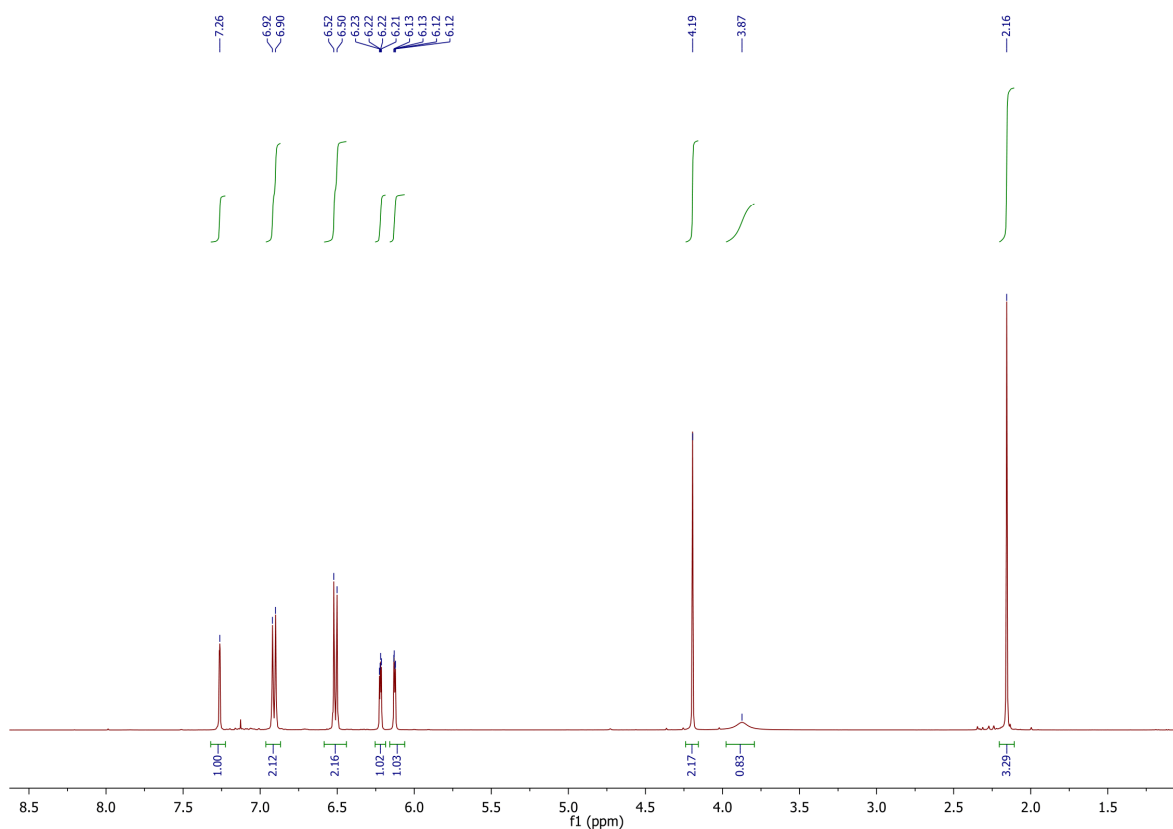

**Figure S9.**  $^1\text{H}$  NMR spectrum of **2d** (400 MHz,  $\text{CDCl}_3$ )

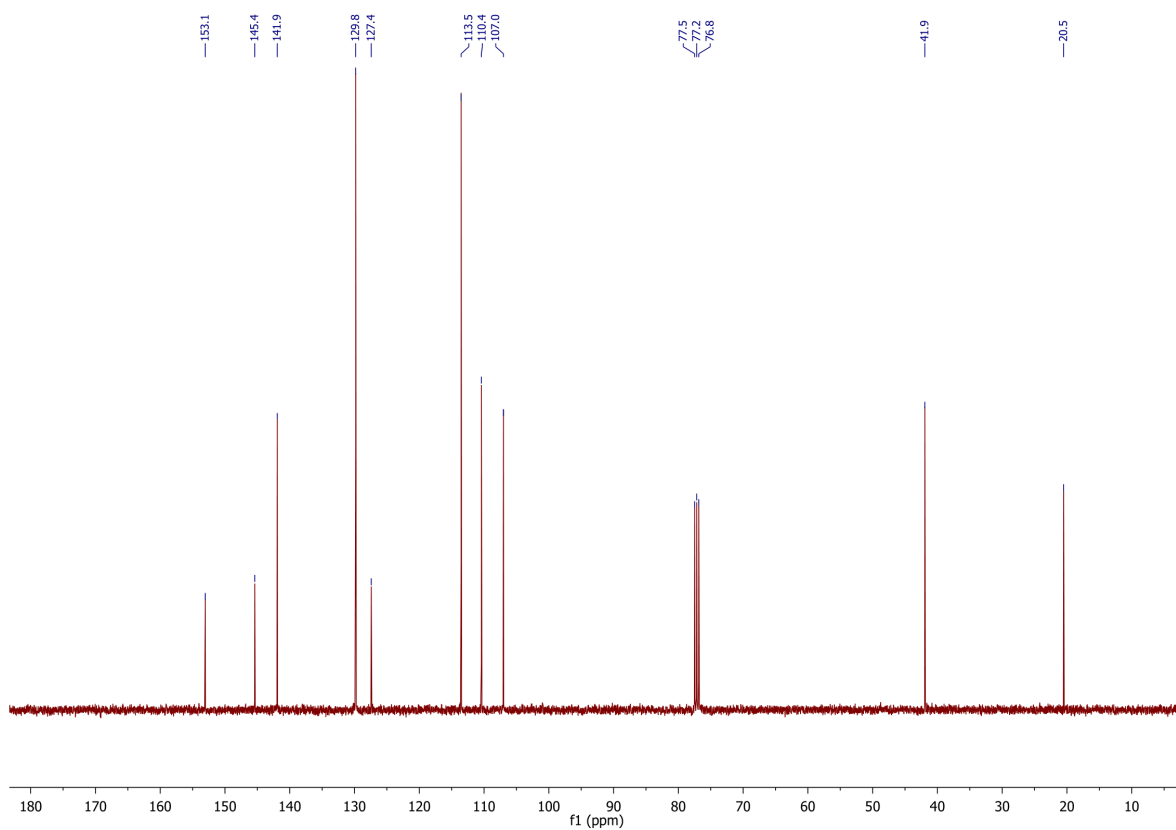

Figure S10. <sup>13</sup>C NMR spectrum of 2d (100 MHz, CDCl<sub>3</sub>)

**4-bromo-*N*-(furan-2-ylmethyl)aniline 2e**

The product **2e** was obtained as a yellow oil. 222 mg, 69 %.  $^1\text{H}$  NMR (400 MHz,  $\text{CDCl}_3$ )  $\delta$ : 7.39 (s, 1 H), 7.29 (d, 2 H,  $J = 8.8$  Hz), 6.59 (d, 2 H,  $J = 8.8$  Hz), 6.34 (dd, 1 H,  $J = 3.2$  Hz,  $J = 2$  Hz), 6.26 (d, 1 H,  $J = 3.2$  Hz), 4.31 (s, 2 H) ppm.  $^{13}\text{C}\{^1\text{H}\}$  NMR (100 MHz)  $\delta$ : 151.9, 146.1, 142.2, 132.0, 115.1, 110.4, 110.2, 107.4, 41.6 ppm.[65]

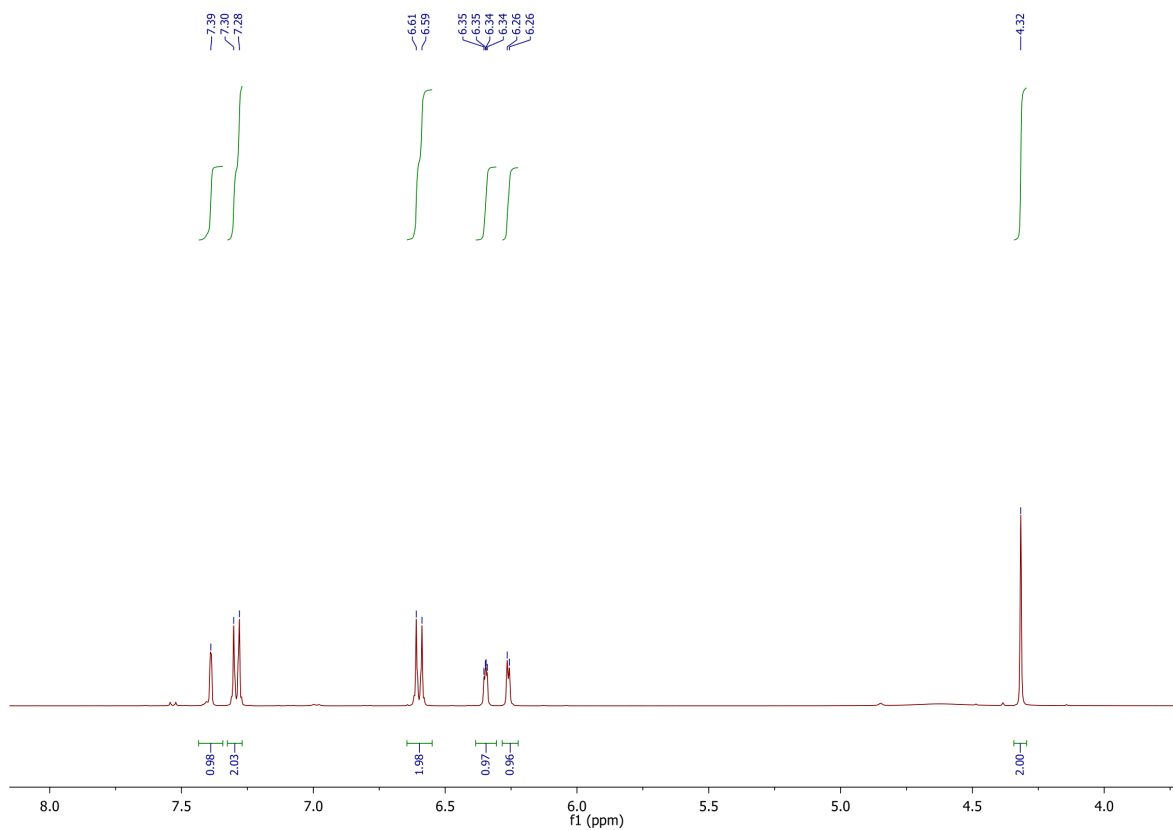

**Figure S11.**  $^1\text{H}$  NMR spectrum of **2e** (400 MHz,  $\text{CDCl}_3$ )

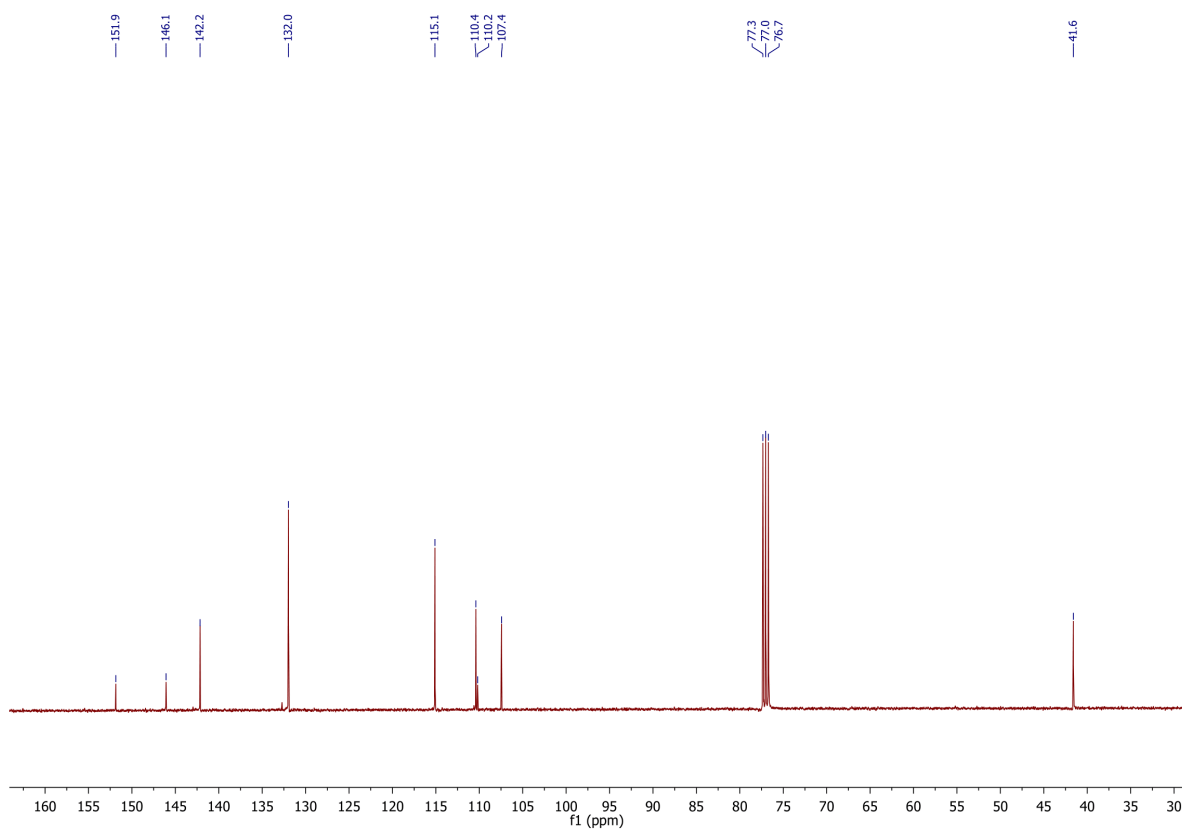

Figure S12. <sup>13</sup>C NMR spectrum of 2e (100 MHz, CDCl<sub>3</sub>)

**2-fluoro-*N*-(furan-2-ylmethyl)aniline 2f**

The product 2f was obtained as a yellow oil. 137 mg, 56 %.  $^1\text{H}$  NMR (400 MHz,  $\text{CDCl}_3$ )  $\delta$ : 7.37 (s, 1 H), 7.02-6.95 (m, 2 H), 6.80 (t, 1 H,  $J = 8.4$  Hz), 6.70-6.66 (m, 1 H), 6.32 (dd, 1 H,  $J = 3.2$  Hz,  $J = 2$  Hz), 6.26 (dd, 1 H,  $J = 3.2$  Hz,  $J = 0.8$  Hz), 4.37 (s, 2 H) ppm.  $^{13}\text{C}\{^1\text{H}\}$  NMR (100 MHz)  $\delta$ : 152.2, 152.0 (d,  $J_{\text{CF}} = 240$  Hz), 142.3, 124.7 (d,  $J_{\text{CF}} = 4$  Hz), 117.9 (d,  $J_{\text{CF}} = 7$  Hz), 114.8, 113.1, 110.5, 107.5, 41.3 ppm.[67]

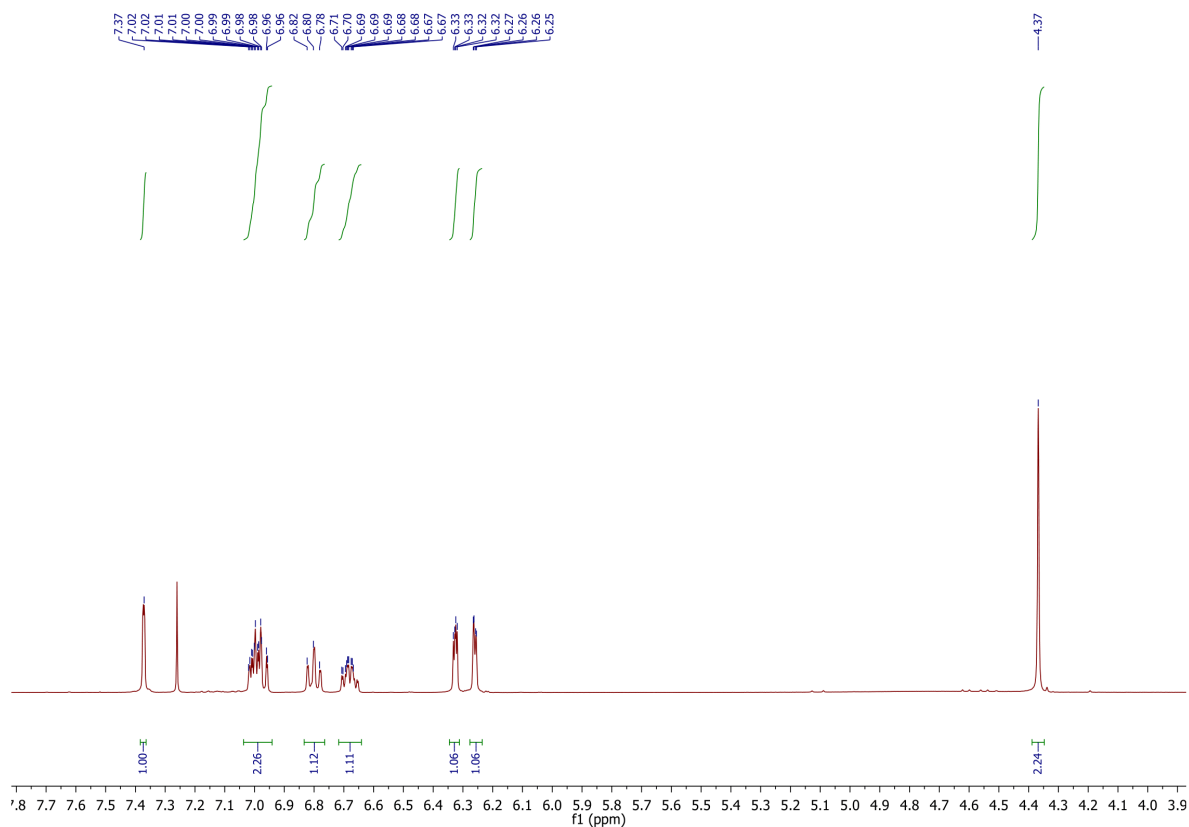

**Figure S13.**  $^1\text{H}$  NMR spectrum of 2f (400 MHz,  $\text{CDCl}_3$ )

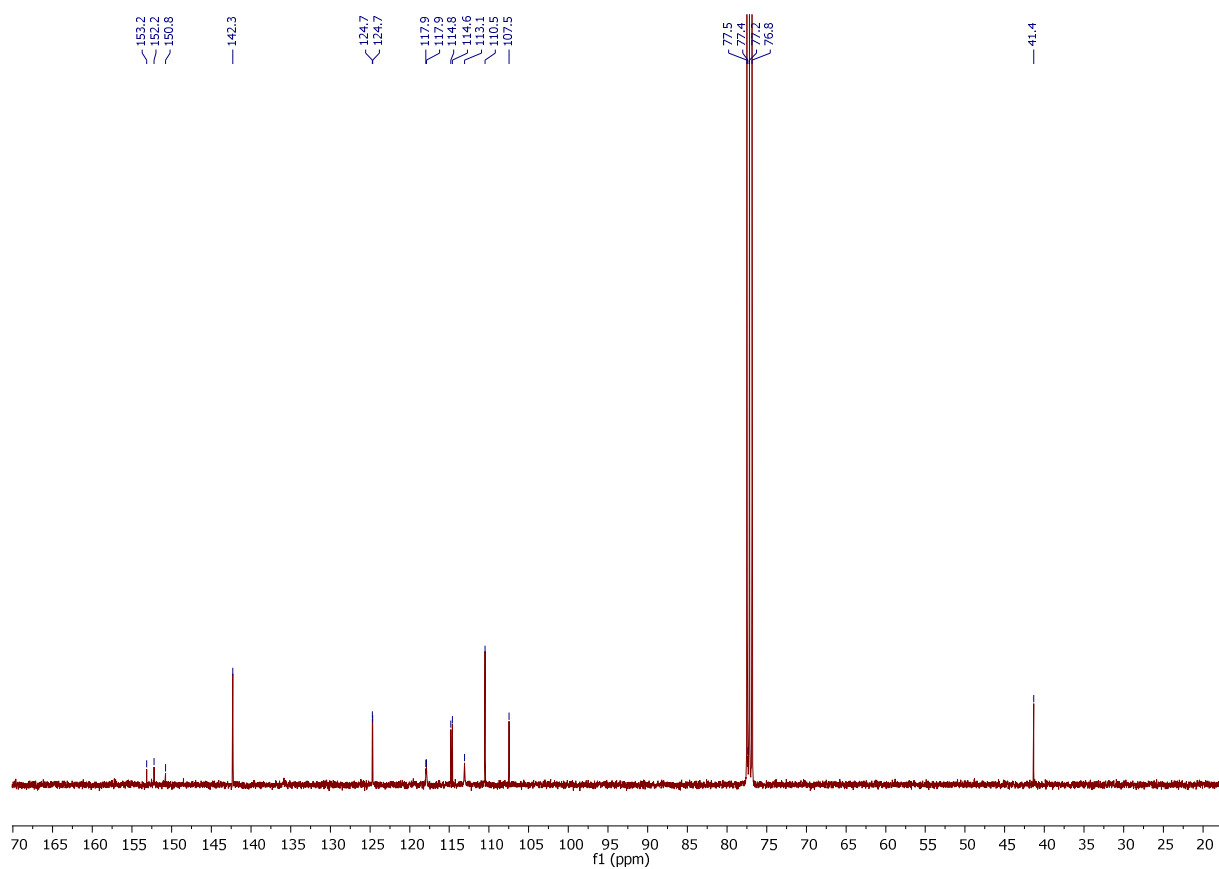

Figure S14. <sup>13</sup>C NMR spectrum of 2f (100 MHz, CDCl<sub>3</sub>)



***N*-(furan-2-ylmethyl)-*N*-methylaniline **2g****

The product **2g** was obtained as a yellow oil. 214 mg, 89 %.  $^1\text{H}$  NMR (400 MHz,  $\text{CDCl}_3$ )  $\delta$ : 7.36 (s, 1 H), 7.18 (t, 2 H,  $J = 7.4$  Hz), 6.70 (t, 2 H,  $J = 8$  Hz), 6.59 (d, 1 H,  $J = 7.6$  Hz), 6.30 (dd, 1 H,  $J = 3.2$  Hz,  $J = 2$  Hz), 6.23 (d, 1 H, 3.2 Hz), 4.52 (s, 2 H), 2.78 (3 H) ppm.  $^{13}\text{C}\{^1\text{H}\}$  NMR (100 MHz)  $\delta$ : 154.2, 149.3, 142.5, 129.2, 117.4, 112.6, 110.4, 107.7, 57.3, 30.8 ppm.[1]

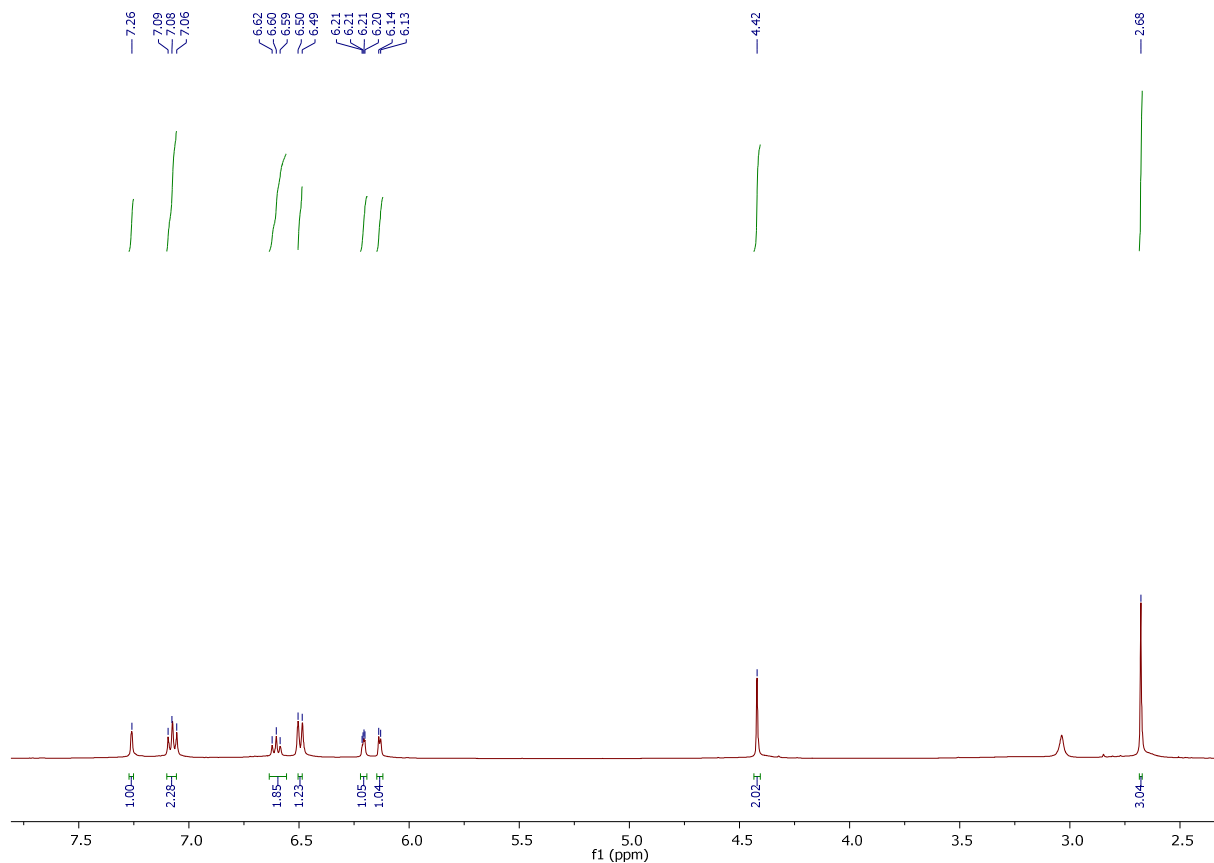

**Figure S15.**  $^1\text{H}$  NMR spectrum of **2g** (400 MHz,  $\text{CDCl}_3$ )

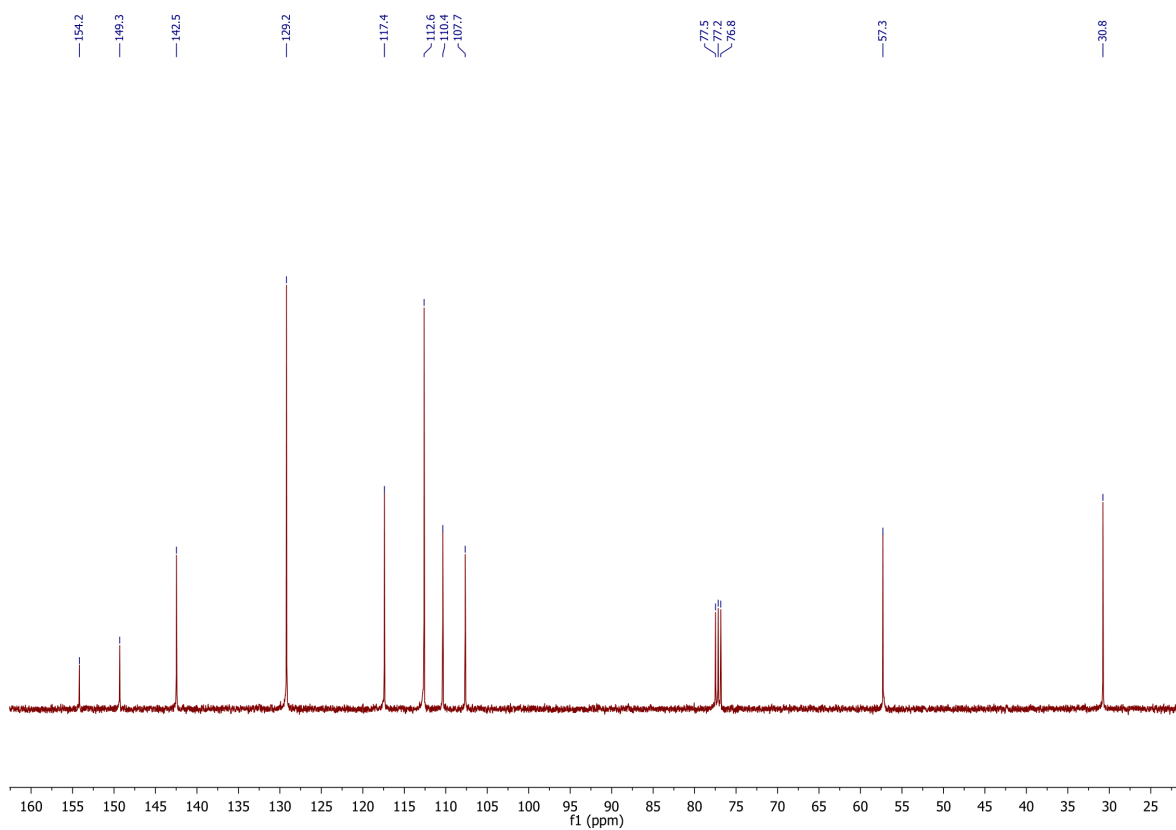

Figure S16. <sup>13</sup>C NMR spectrum of 2g (100 MHz, CDCl<sub>3</sub>)

#### 4-fluoro-*N*-(furan-2-ylmethyl)aniline **2h**

The product **2h** was obtained as a white powder. 182 mg, 74 %.  $^1\text{H}$  NMR (400 MHz, MeOD)  $\delta$  7.65 (d, 1 H,  $J = 1.2$  Hz), 7.41-7.37 (m, 2 H), 7.29 (t, 2 H,  $J = 8.4$  Hz), 6.52 (d, 1 H,  $J = 3.2$  Hz), 6.48 (dd, 1 H,  $J = 3.6$  Hz,  $J = 2$  Hz), 4.68 (s, 3 H) ppm.  $^{13}\text{C}\{^1\text{H}\}$  NMR (100 MHz)  $\delta$ : 156.2 (d,  $J_{\text{CF}} = 260$  Hz), 152.6, 143.9 (d,  $J_{\text{CF}} = 1$  Hz), 142.0, 115.7 (d,  $J_{\text{CF}} = 23$  Hz), 114.2 (d,  $J_{\text{CF}} = 7$  Hz), 110.4, 107.2, 42.1 ppm.[1]

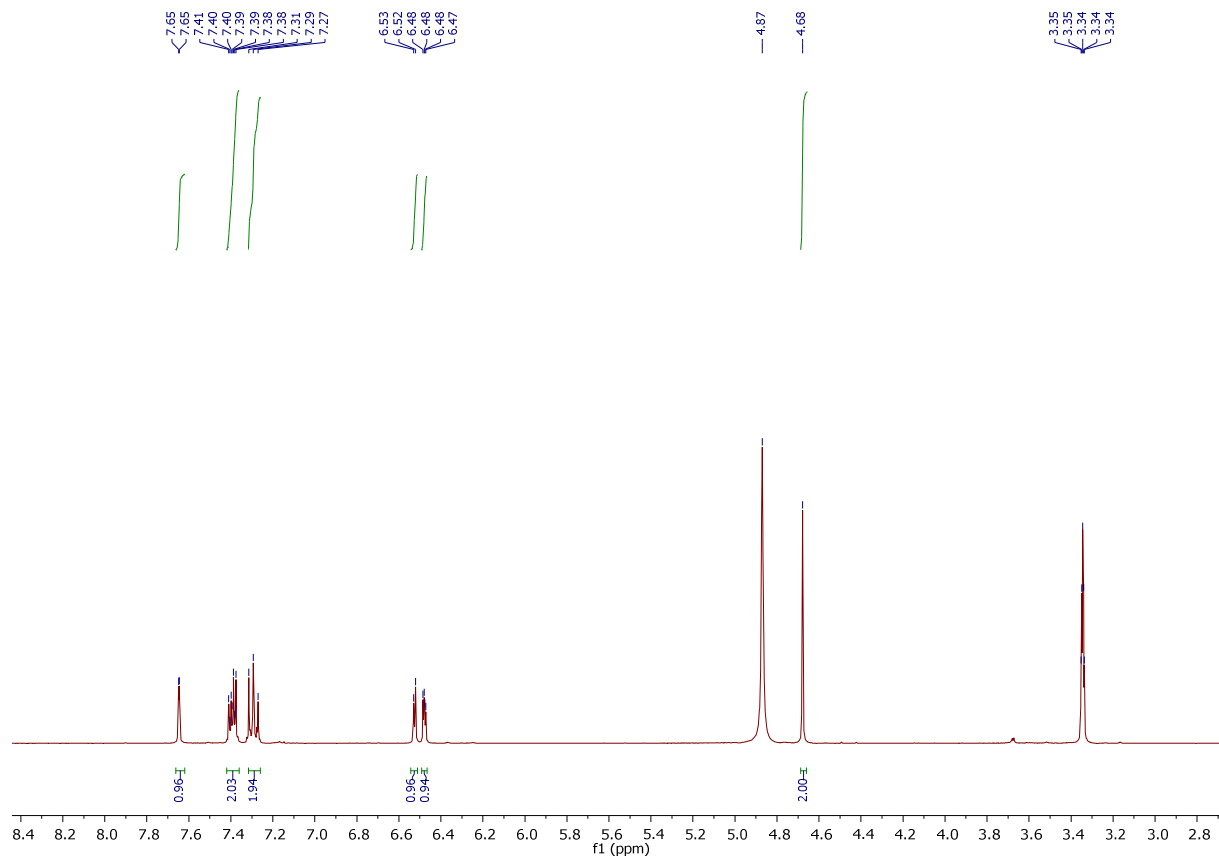

Figure S17.  $^1\text{H}$  NMR spectrum of **2h** (400 MHz,  $\text{CD}_3\text{OD}$ )

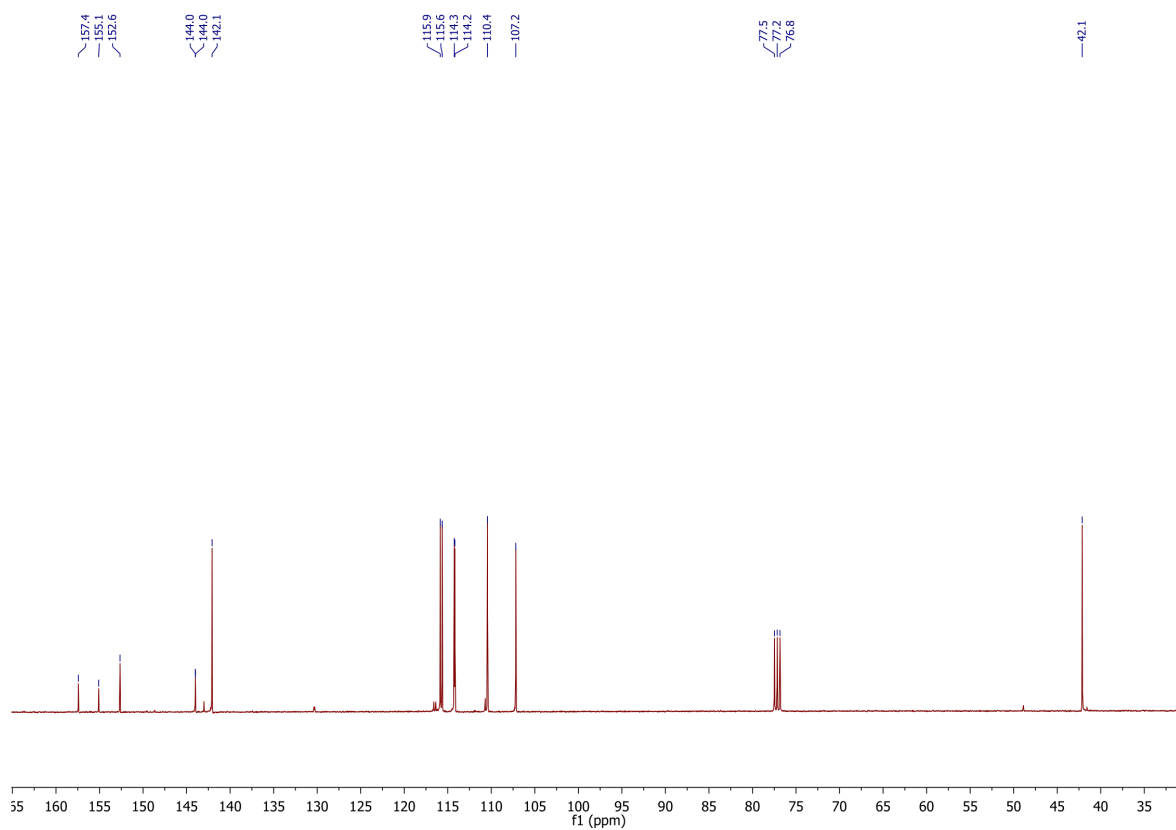

Figure S18. <sup>13</sup>C NMR spectrum of 2h (100 MHz, CDCl<sub>3</sub>)

***N*-(furan-2-ylmethyl)-4-(trifluoromethyl)aniline **2i****

The product **2i** was obtained as a yellow oil. 239 mg, 77 %.  $^1\text{H}$  NMR (400 MHz,  $\text{CDCl}_3$ )  $\delta$ : 7.44 (d, 2 H,  $J = 8.4$  Hz), 7.40 (s, 1 H), 6.70 (d, 2 H,  $J = 8.4$  Hz), 6.35 (dd, 1 H,  $J = 3.2$  Hz,  $J = 2$  Hz), 6.27 (d, 1 H,  $J = 3.2$  Hz) ppm.  $^{13}\text{C}\{^1\text{H}\}$  NMR (100 MHz)  $\delta$ : 151.7, 149.8, 142.4, 126.7 (q,  $J_{\text{CF}} = 3$  Hz), 124.0 (q,  $J_{\text{CF}} = 270$  Hz), ( 119.8 (q,  $J_{\text{CF}} = 32$  Hz), 112.6, 110.5, 107.6, 41.1 ppm.[68]

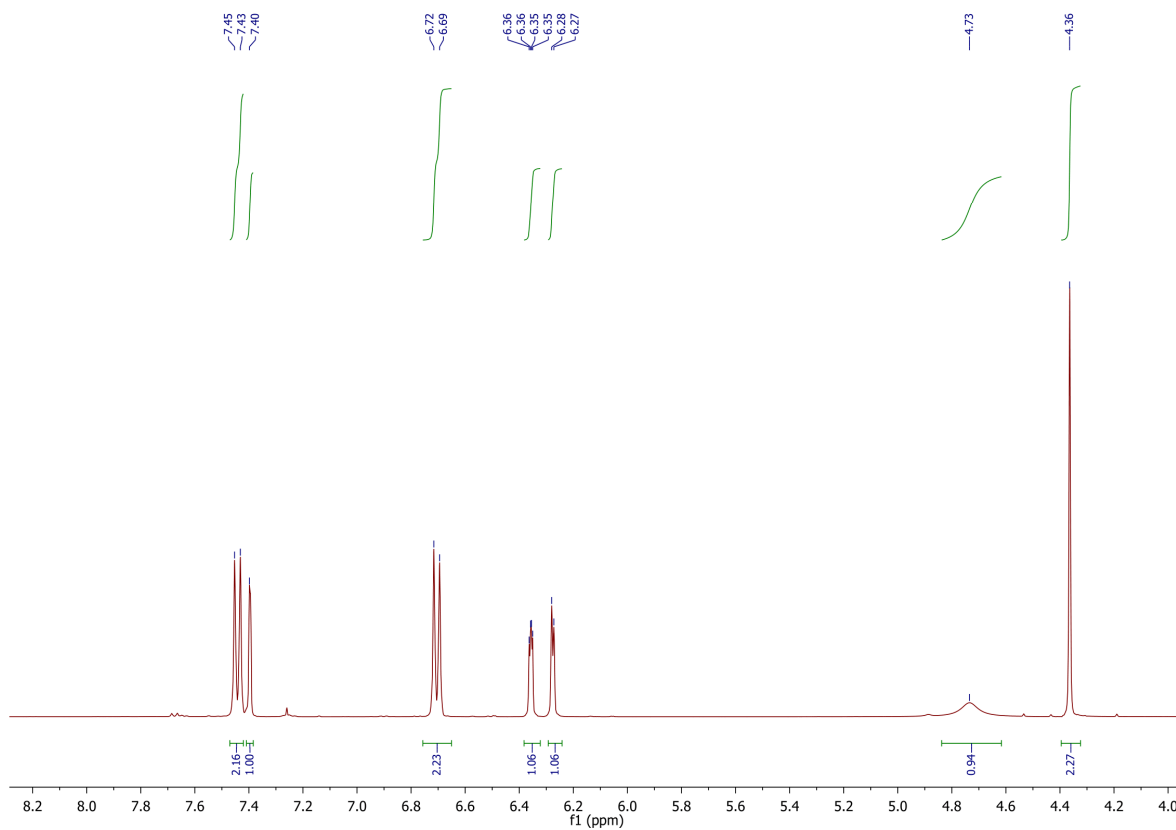

**Figure S19.**  $^1\text{H}$  NMR spectrum of **2i** (400 MHz,  $\text{CDCl}_3$ )

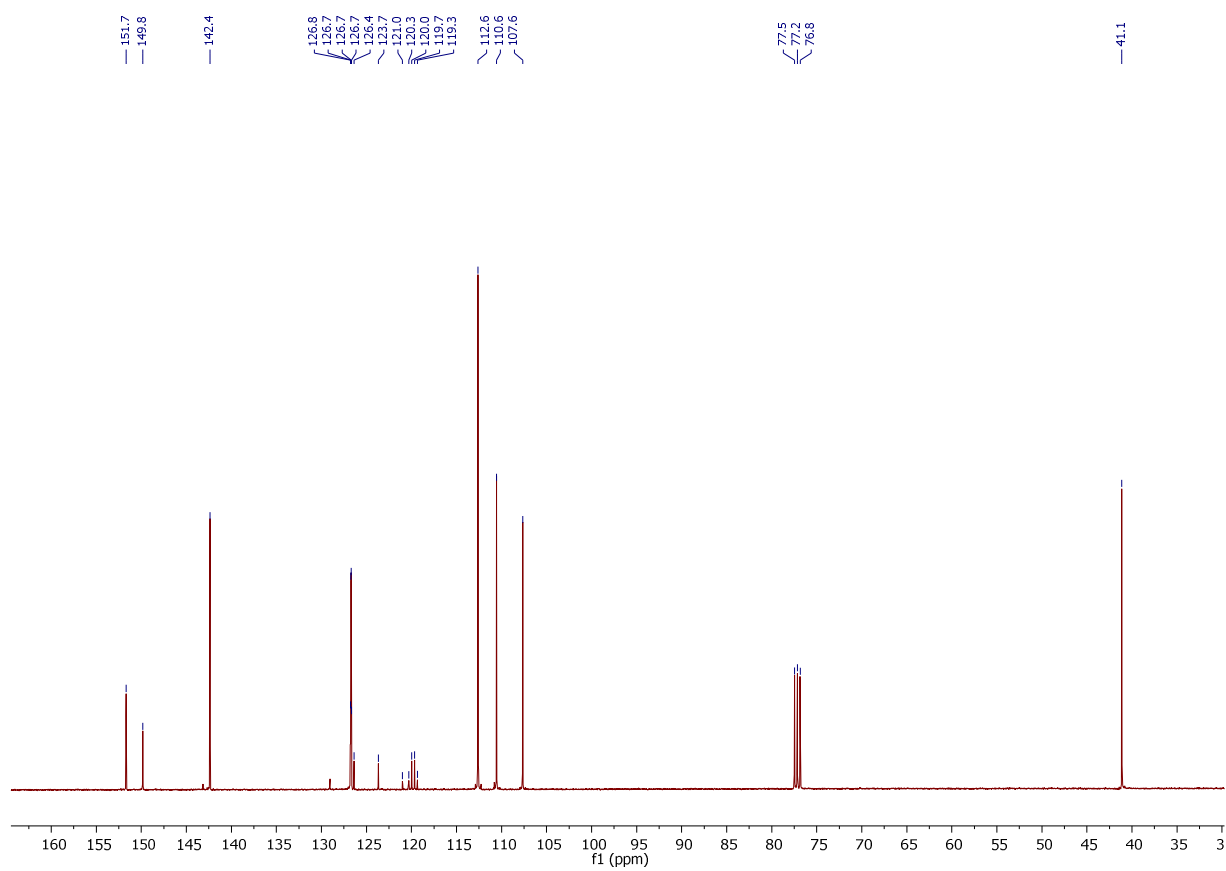

Figure S20. <sup>13</sup>C NMR spectrum of 2i (100 MHz, CDCl<sub>3</sub>)

***N*-(furan-2-ylmethyl)pyridin-4-amine 2j**

The product **2i** was obtained as a yellow oil. 212 mg, 95 %.  $^1\text{H}$  NMR (400 MHz,  $\text{CDCl}_3$ )  $\delta$ : 8.13 (d, 2 H,  $J$  = 6.4 Hz), 7.37 (d, 1 H,  $J$  = 0.8 Hz), 6.49 (d, 2 H,  $J$  = 6 Hz), 6.31 (dd, 1 H,  $J$  = 5.2 Hz,  $J$  = 1.6 Hz), 6.25 (d, 1 H,  $J$  = 2.4 Hz), 4.60 (s, 2 H), 4.29 (s, 1 H) ppm.  $^{13}\text{C}\{^1\text{H}\}$  NMR (100 MHz)  $\delta$ : 151.7, 150.8, 147.8, 129.3, 181.1, 113.3, 108.0, 106.3, 41.7, 13.7 ppm.[69]

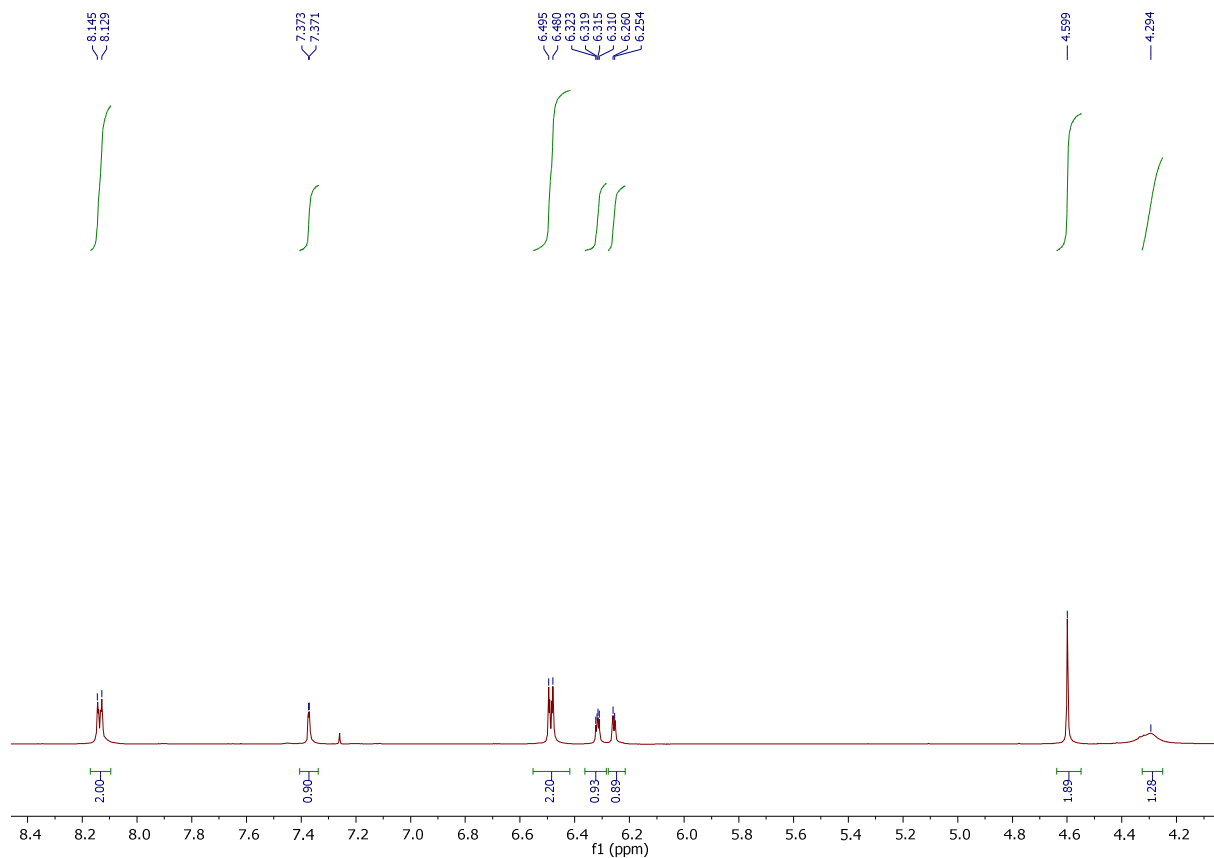

**Figure S21.**  $^1\text{H}$  NMR spectrum of **2j** (400 MHz,  $\text{CDCl}_3$ )

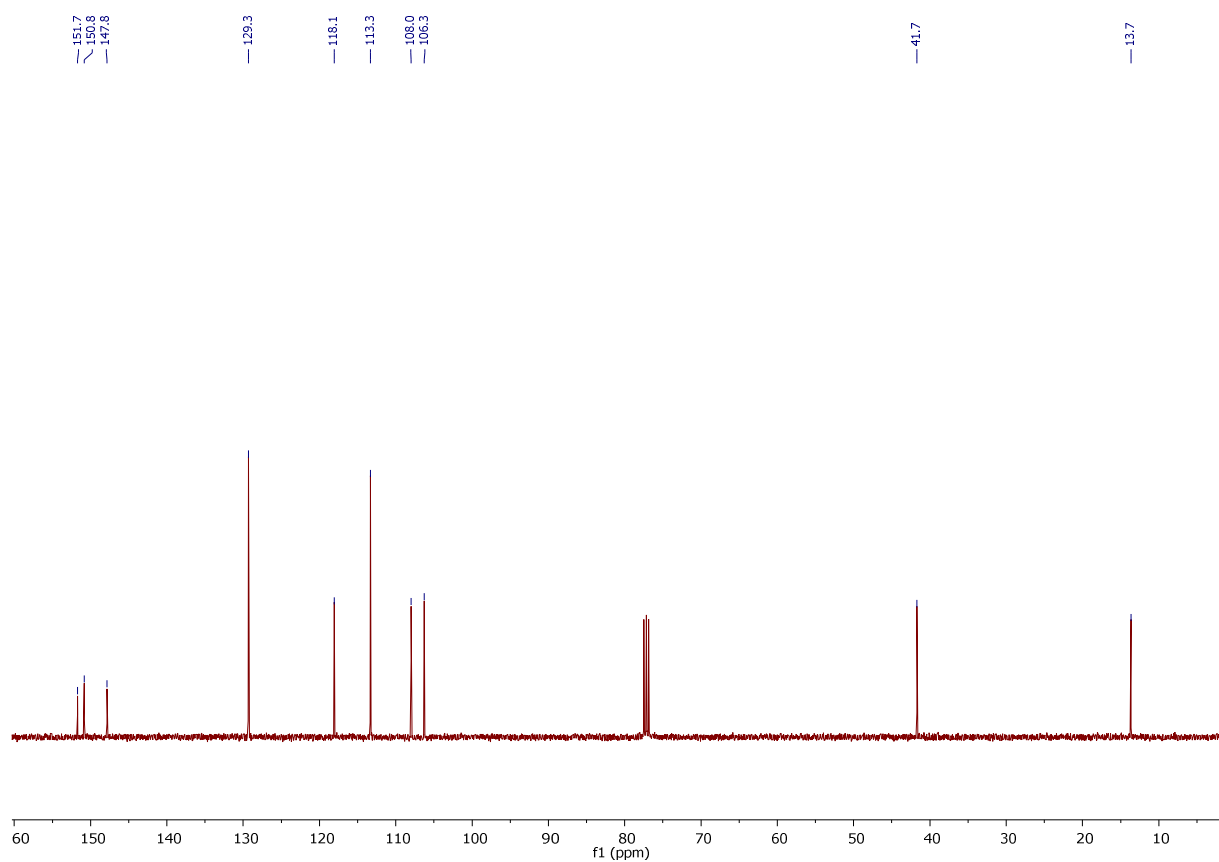

Figure S22. <sup>13</sup>C NMR spectrum of 2j (100 MHz, CDCl<sub>3</sub>)



**(5-((phenylamino)methyl)furan-2-yl)methanol 4**

The product **4** was obtained as a yellow oil. 230 mg, 87 %.  $^1\text{H}$  NMR (400 MHz,  $\text{CDCl}_3$ )  $\delta$ : 7.19 (t, 2 H,  $J = 7.2$  Hz), 6.75 (t, 1 H,  $J = 7.2$  Hz), 6.67 (d, 2 H,  $J = 8$  Hz), 6.21-6.17 (m, 2 H), 4.55 (s, 2 H), 4.29 (s, 2 H) ppm.  $^{13}\text{C}\{^1\text{H}\}$  NMR (100 MHz)  $\delta$ : 153.6, 153.0, 147.6, 129.2, 118.2, 113.4, 108.7, 107.9, 57.5, 41.6 ppm.[70]

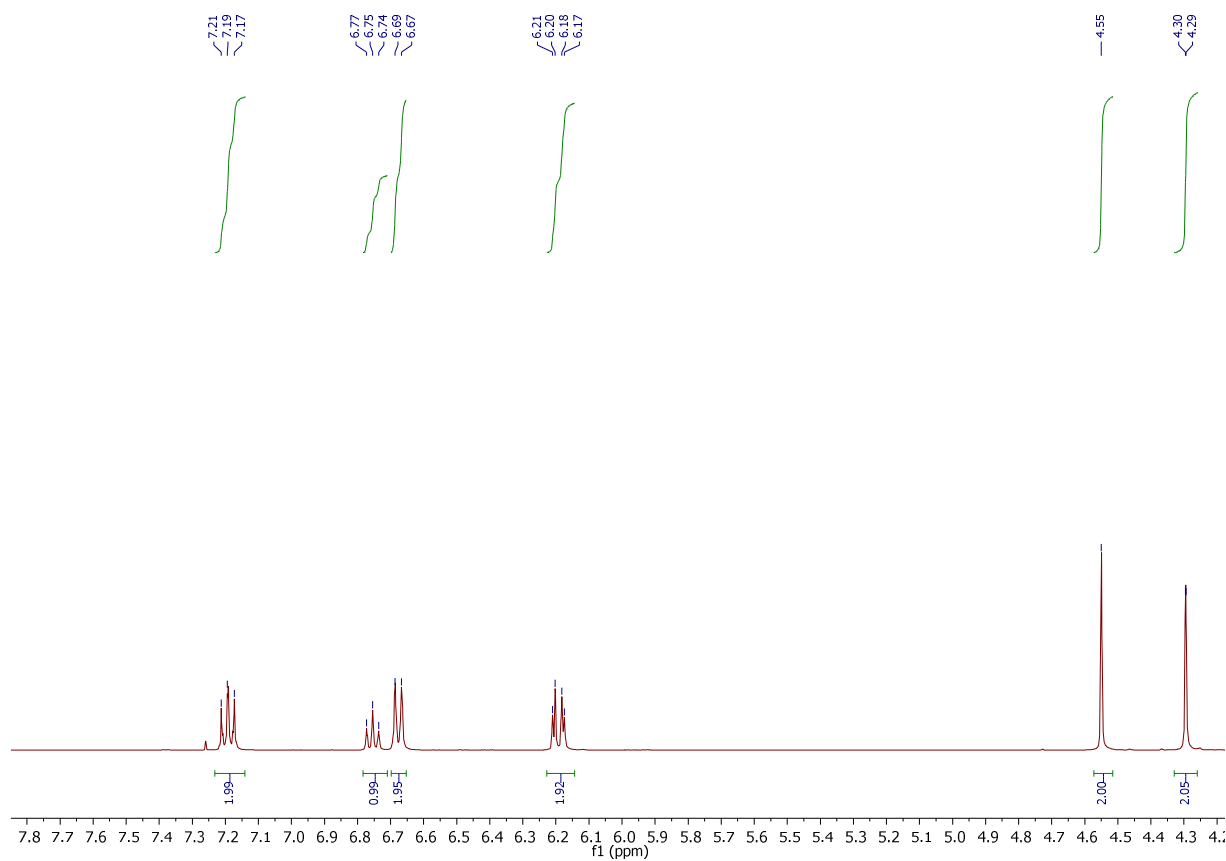

**Figure S23.**  $^1\text{H}$  NMR spectrum of **4** (400 MHz,  $\text{CDCl}_3$ )

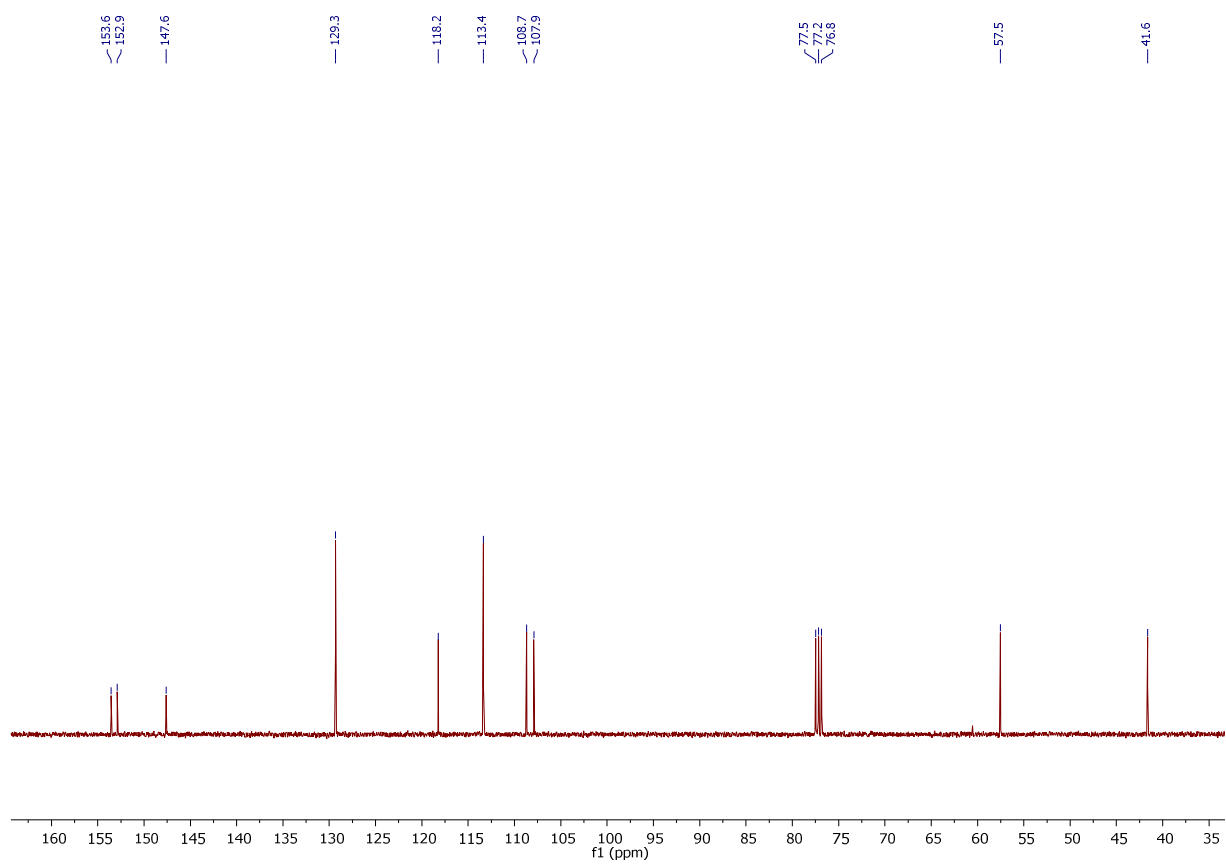

Figure S24. <sup>13</sup>C NMR spectrum of 4 (100 MHz, CDCl<sub>3</sub>)

***N*-((5-methylfuran-2-yl)methyl)aniline **5****

The product **5** was obtained as a colorless oil. 230 mg, 54 %.  $^1\text{H}$  NMR (400 MHz,  $\text{CDCl}_3$ )  $\delta$ : 7.21 (t, 2 H,  $J = 8$  Hz), 6.76 (t, 1 H,  $J = 7.2$  Hz), 6.70 (2 H,  $J = 8.8$  Hz), 6.13 (d, 1 H, 2.8 Hz), 5.92 (d, 1 H,  $J = 2.4$  Hz), 4.27 (s, 2 H), 4.06 (s, 1 H), 2.30 (s, 3 H) ppm.  $^{13}\text{C}\{^1\text{H}\}$  NMR (100 MHz)  $\delta$ : 154.8, 153.2, 149.9, 149.8, 142.3, 110.4, 109.7, 107.4, 57.1, 57.0 ppm.[62]

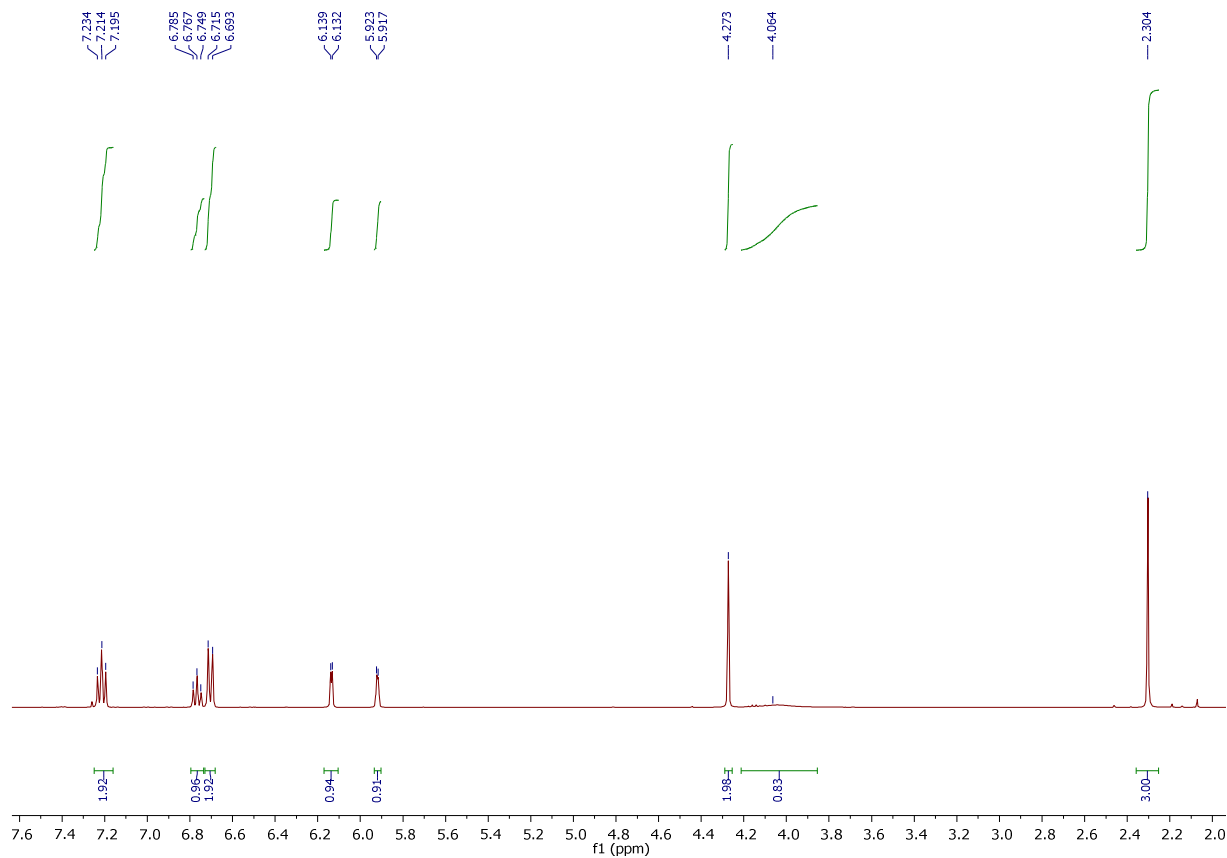

**Figure S25.**  $^1\text{H}$  NMR spectrum of **5** (400 MHz,  $\text{CDCl}_3$ )

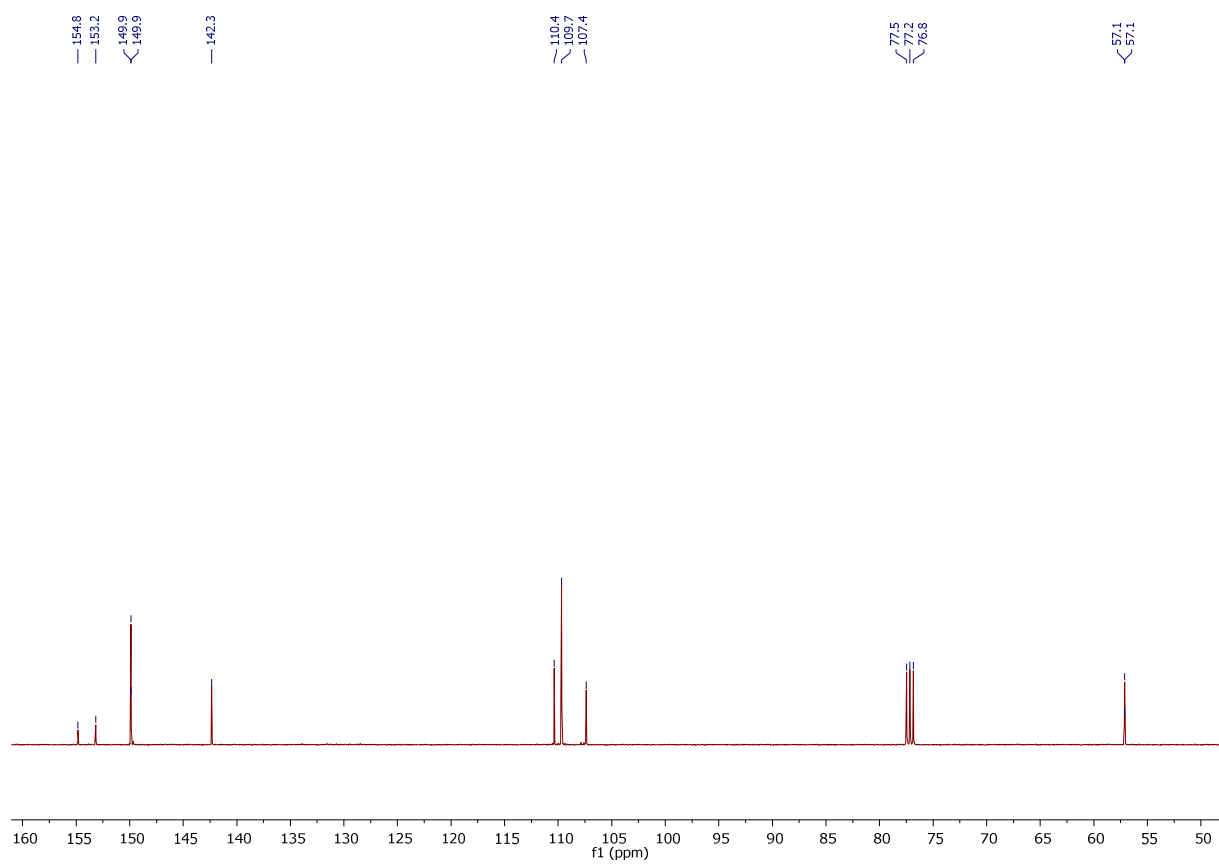

Figure S26. <sup>13</sup>C NMR spectrum of 5 (100 MHz, CDCl<sub>3</sub>)
